# Supplementary material for: Determination of the swimming mechanism of Au@TiO2 active matter and implications on active–passive interactions
Source: Royal Society of Chemistry journal article supplement (doi:10.1039/d2sm01097f), 2022-12-15
Supplement: d2sm01097f2.pdf [file d2sm01097f2.pdf]

# Supporting Information

## Determination of the swimming mechanism of Au@TiO<sub>2</sub> active matter and implications on active-passive interactions

Linlin Wang and Juliane Simmchen\*

December 13, 2022

### 1 Video list

Video S1: Motion of Au@TiO<sub>2</sub> micromotors in different concentrations (0.05%, 0.5%, 1% and 2.5%) of H<sub>2</sub>O<sub>2</sub> solution under 100% UV light.

Video S2: Motion of Au@TiO<sub>2</sub> micromotors under different levels of UV light (2%, 10%, 50% and 100%) in 0.5% H<sub>2</sub>O<sub>2</sub> diluted solution, the corresponding intensities are listed here [1].

Video S3: Motion of Au@TiO<sub>2</sub> micromotors in 0.5% H<sub>2</sub>O<sub>2</sub> diluted solution containing different concentrations of KCl under 100% UV light.

Video S4: Assembly of passive particles induced by one immobilized Au@TiO<sub>2</sub> particle.

Video S5: Active-passive raft formation process with one active Au@TiO<sub>2</sub> micromotor in 1% H<sub>2</sub>O<sub>2</sub> solution.

Video S6: Active-passive stable rafts in 0.5% H<sub>2</sub>O<sub>2</sub> solution containing different concentrations of KCl under 100% UV light.

Video S7: Active-passive stable rafts in different concentrations of H<sub>2</sub>O<sub>2</sub> solution under 100% UV light.

Video S8: Active-passive stable rafts under different intensities of UV light in 0.5% H<sub>2</sub>O<sub>2</sub> solution.

## 2 Summary of the three motion modes during the active-passive raft formation process

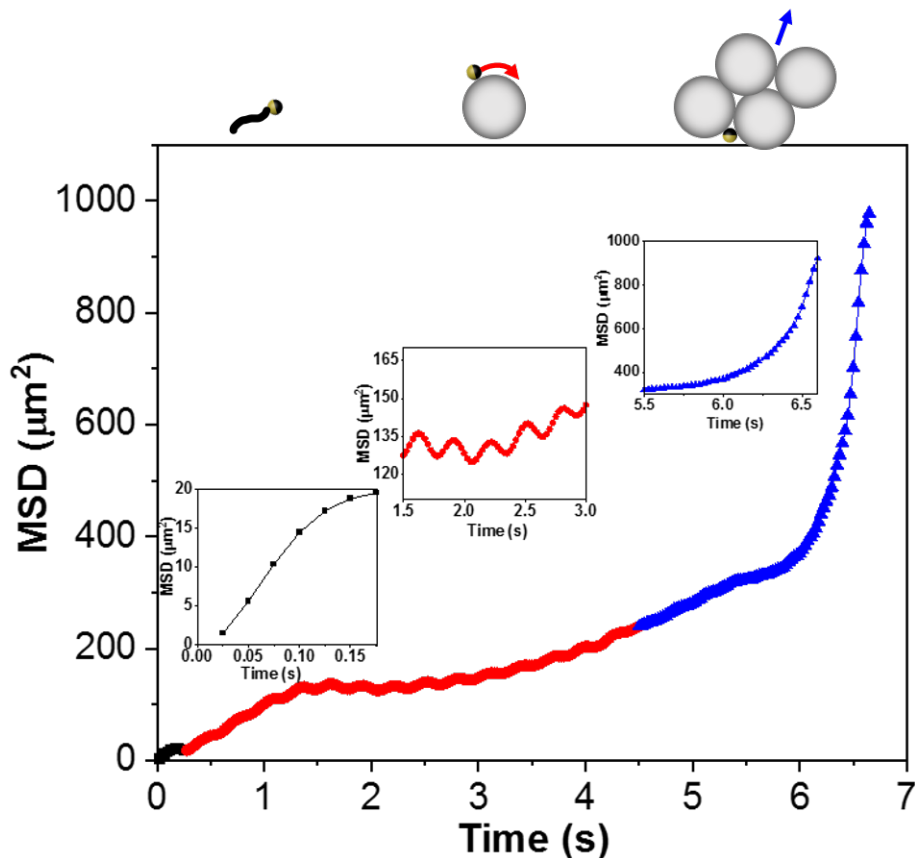

Figure S1: Mean square displacement of active swimmers in 1%  $\text{H}_2\text{O}_2$  with 100% UV light illustrating three motion stages: Free swimming (black), spinning (red) and ballistic raft (blue). Free active swimmers first show ballistic motion. Upon encounter of a passive particle, a pair is formed and results in spinning motion. When more passive particles are captured at the front of the active particle, the small raft shows ballistic motion again, for more info read [2]

## 3 Oxygen generation measurement

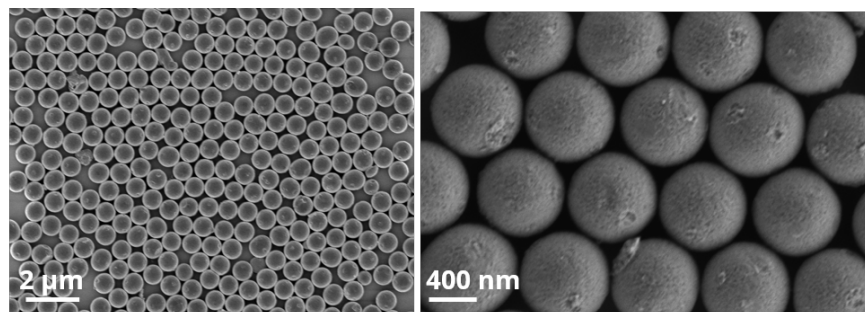

Figure S2: SEM images of a monolayer of  $\text{TiO}_2$  particles.

## 4 COMSOL

### 4.1 Simulated electric field vs. $\text{H}_2\text{O}_2$ concentration

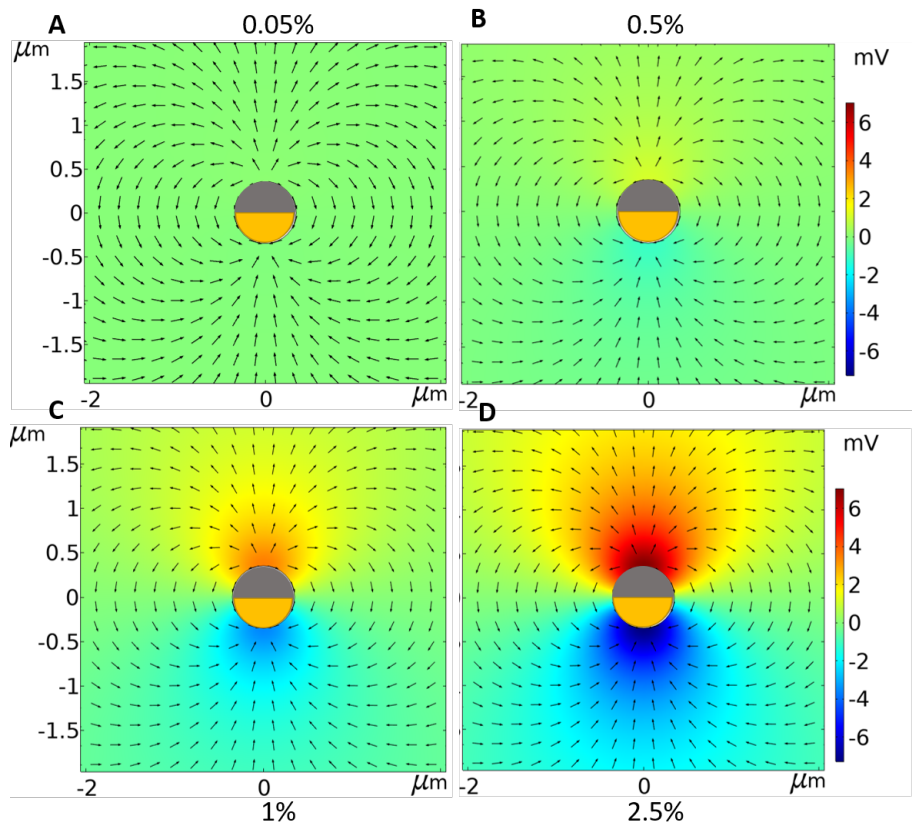

Figure S3: (A-D) Electric potential distribution around an active swimmer in different concentrations of  $\text{H}_2\text{O}_2$  solution (0.05%, 0.5%, 1% and 2.5%). The arrows represent the direction of electric field.

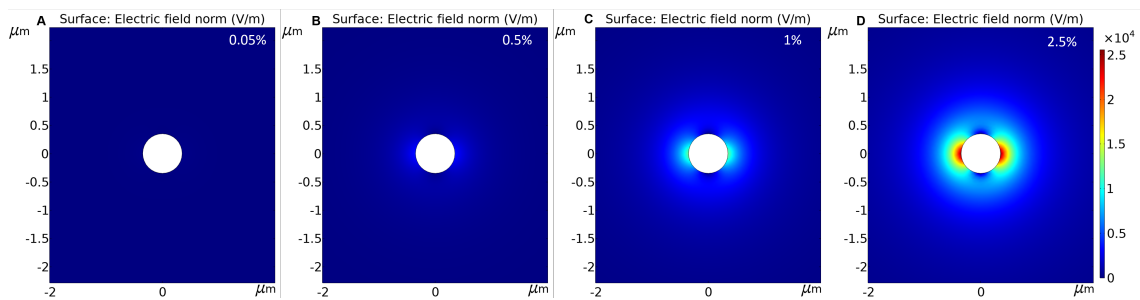

Figure S4: (A-D) Self-induced electric fields produced by active swimmers in different concentrations of  $\text{H}_2\text{O}_2$  simulated by COMSOL Multiphysics. The intensity of the electric field increases with the increase of  $\text{H}_2\text{O}_2$  concentration.

## 5 Speed

| Sample condition             | Experimental speed ( $\mu\text{m/s}$ ) | Self-diffusiophoretic speed ( $\mu\text{m/s}$ ) | Self-electrophoretic speed ( $\mu\text{m/s}$ ) | COMSOL simulated speed ( $\mu\text{m/s}$ ) |
|------------------------------|----------------------------------------|-------------------------------------------------|------------------------------------------------|--------------------------------------------|
| 0.05% $\text{H}_2\text{O}_2$ | 24.98                                  | $7.44 \times 10^{-7}$                           | 3.82                                           | 3.45                                       |
| 0.5% $\text{H}_2\text{O}_2$  | 138.50                                 | $1.32 \times 10^{-5}$                           | 50.07                                          | 44.3                                       |
| 1% $\text{H}_2\text{O}_2$    | 165.57                                 | $4.86 \times 10^{-5}$                           | 157.46                                         | 140.1                                      |
| 2.5% $\text{H}_2\text{O}_2$  | 204.09                                 | $1.23 \times 10^{-4}$                           | 301.66                                         | 239.1                                      |

Table S1: The experimentally measured, calculated self-diffusiophoretic, self-electrophoretic and COMSOL simulated speed of active Janus  $\text{AuTiO}_2$  swimmers. The calculated and simulated speed based on self-electrophoretic motion are in reasonable range while the diffusiophoretic speed is several orders magnitude smaller than experimentally analyzed speed.

## 6 Salt addition influences the zeta potential of Janus $\text{Au@TiO}_2$ particles, the conductivity of the solution and the speed of active swimmers

| Sample name                        | Zeta potential (mV) | Conductivity (mS/cm) |
|------------------------------------|---------------------|----------------------|
| Janus                              | -30.02              | 0.0078               |
| Janus+ $1.25 \times 10^{-5}$ M KCl | -20.23              | 0.0047               |
| Janus+ $1.25 \times 10^{-4}$ M KCl | -18.10              | 0.0166               |
| Janus+ $1.25 \times 10^{-3}$ M KCl | -15.23              | 0.1183               |
| Janus+ $1.25 \times 10^{-2}$ M KCl | -12.23              | 0.1867               |
| Janus+ $1.25 \times 10^{-1}$ M KCl | -10.71              | 0.6000               |

Table S2: Table of zeta potential and conductivity of Janus  $\text{Au@TiO}_2$  in 0.5%  $\text{H}_2\text{O}_2$  solution containing different concentrations of KCl.

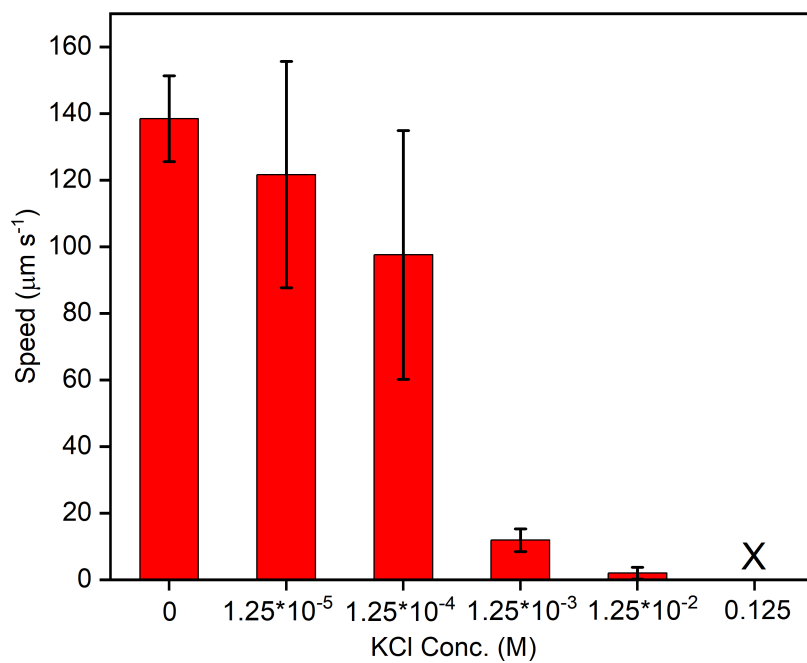

Figure S5: Speed of active swimmer in 0.5% H<sub>2</sub>O<sub>2</sub> containing different concentrations of KCl. The speed decreases after adding KCl salt. At a concentration of 0.125 M, Au@TiO<sub>2</sub> particles are stuck on the substrate.

## 7 Passive particles' influence on proton concentration and generated electric field

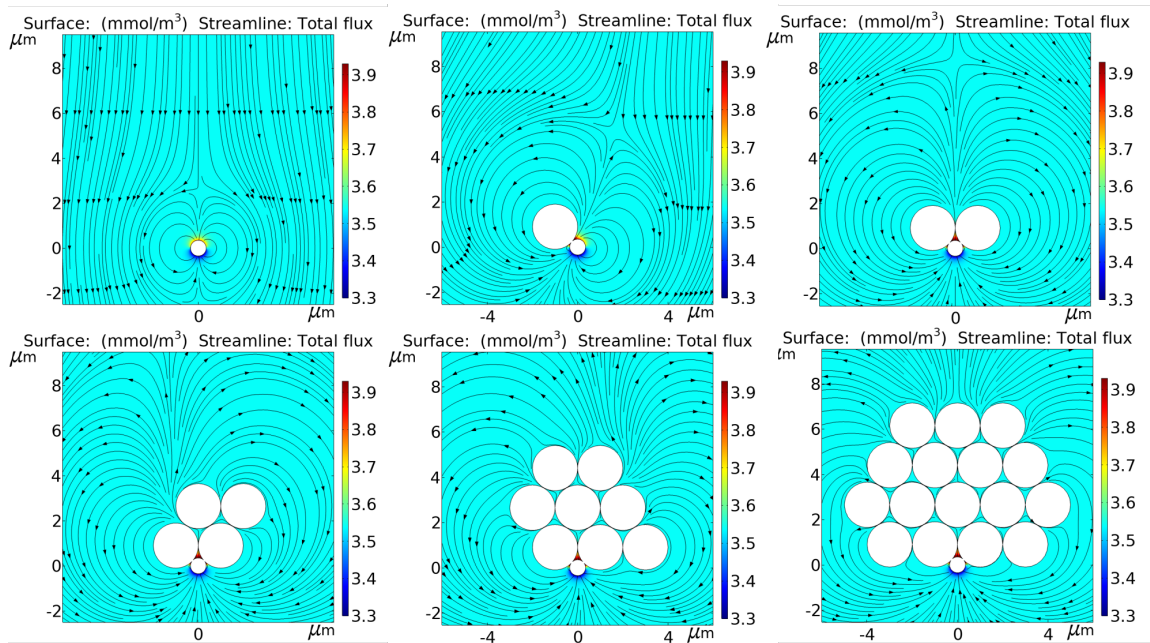

Figure S6: Proton concentration distribution when different numbers (0, 1, 2, 4, 8, 16) of passive particles stay at the front of active particle. Stream lines are the proton flux.

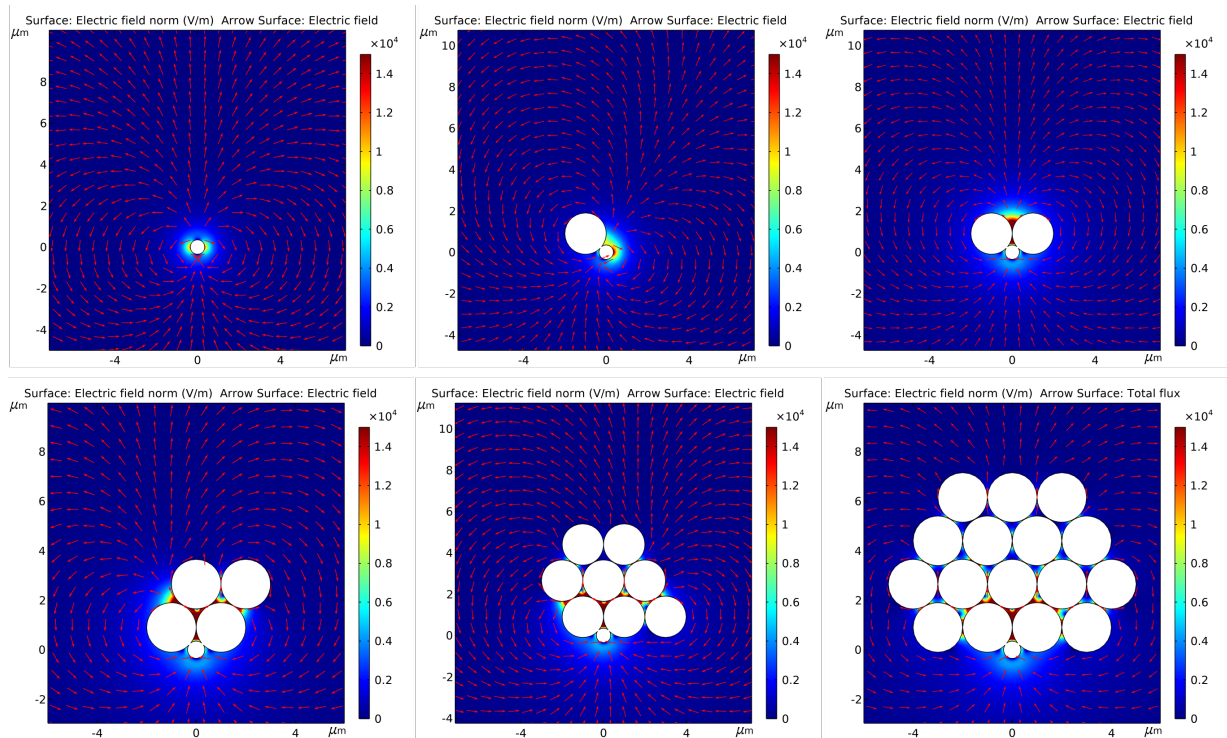

Figure S7: Electrical potential distribution when different numbers (0, 1, 2, 4, 8, 16) of passive particles stay at the front of active particle. The arrows represent the direction of electric field.

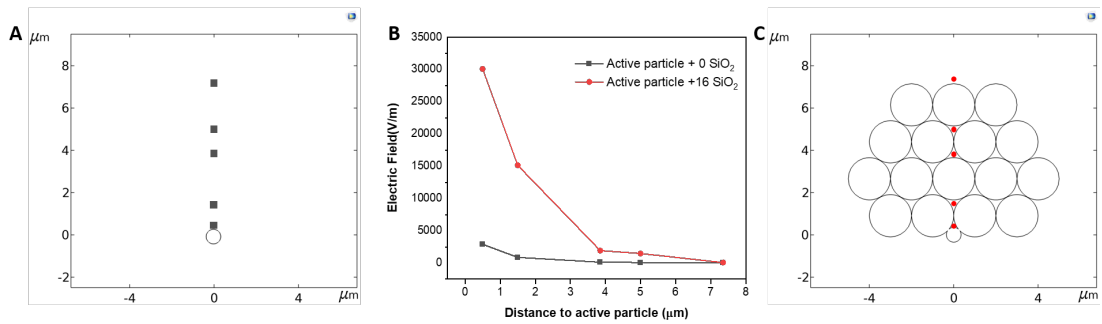

Figure S8: Scheme illustrating the points which are 0.5, 1.5, 3.85, 5, and 7.35  $\mu\text{m}$  away from active particle: (A) active particle + 0  $\text{SiO}_2$  particle, (C) active + 16  $\text{SiO}_2$  particles. (B) The electric field at these certain points. The electric field increases at these points when 16 passive particles are collected at the front of active particle compared to the electric field of pure active particle.

## References

- [1] Sandra Heckel, Martin Wittmann, and Juliane Simmchen. Measurement of LED Light Intensities in an Inverted Microscope. 2021.
- [2] Ian P Madden, Linlin Wang, Juliane Simmchen, and Erik Luijten. Hydrodynamically controlled self-organization in mixtures of active and passive colloids. *Small*, page 2107023, 2022.
