# Supplementary figures and images for: Determination of the swimming mechanism of Au@TiO2 active matter and implications on active–passive interactions
Source: Royal Society of Chemistry journal article supplement (doi:10.1039/d2sm01097f), 2022-12-15

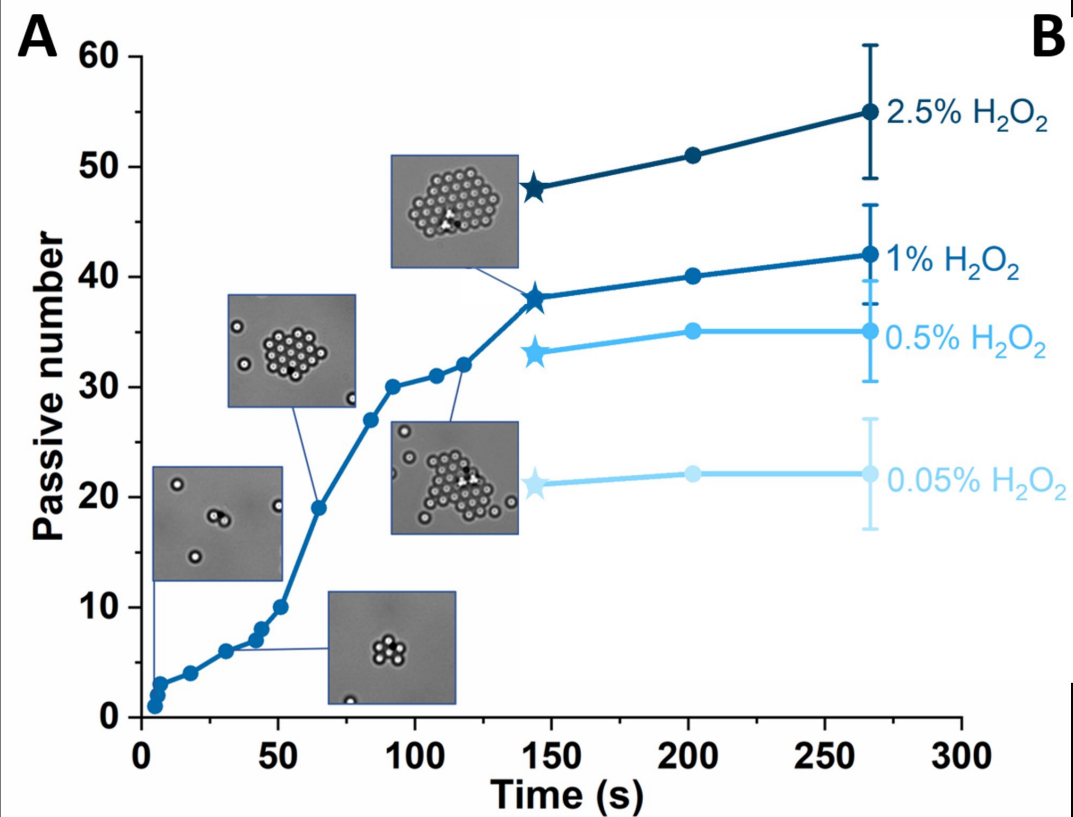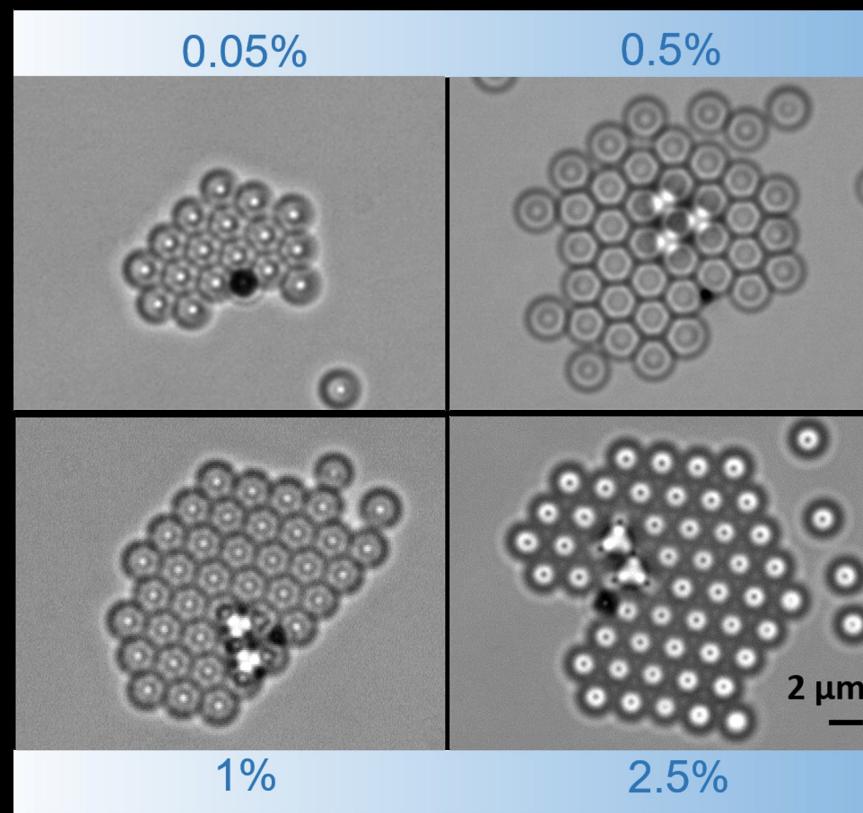

Speed

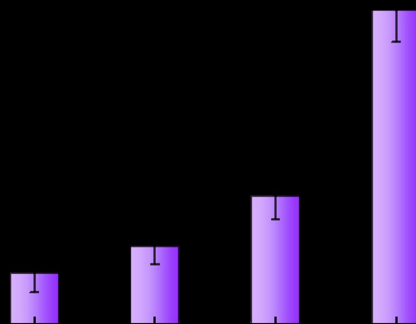

Intensity (%)

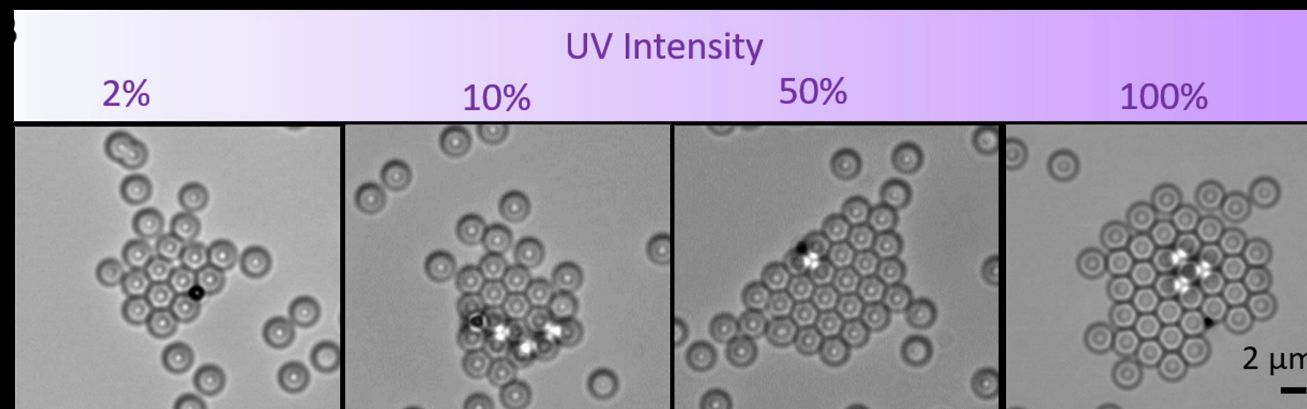

Supplement: d2sm01097f1.pdf [file d2sm01097f1.pdf]
